# Supplementary material for: Overt Increase of Oxidative Stress and DNA Damage in Murine and Human Colitis and Colitis-Associated Neoplasia
Source: Oxford University Press journal article supplement (doi:10.1158/1541-7786.mcr-17-0451), 2018-01-29
Supplement: 15417786mcr170451-sup-188142_2_supp_4457200_p1mm96.pdf [file 15417786mcr170451-sup-188142_2_supp_4457200_p1mm96.pdf]

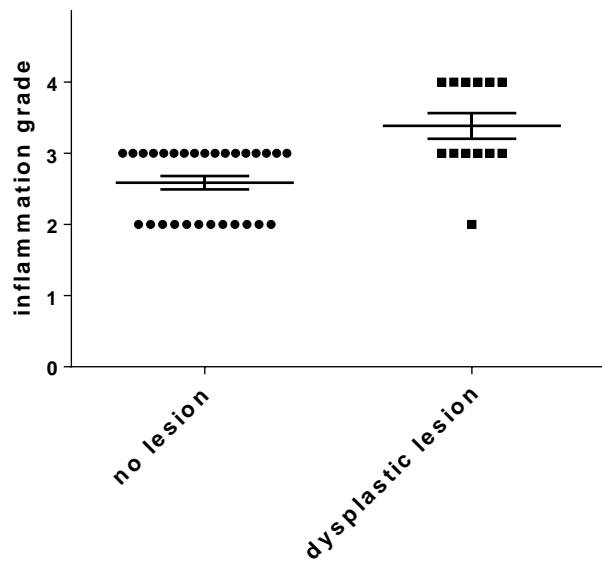

**Supplementary Figure 1: Tumor burden and inflammation in IL-10 KO mice.**

**A:** Piroxicam fed mice with and without dysplastic lesions are shown with their respective grade of inflammation. The number of dysplastic lesions was positively correlated to the grade of inflammation ( $R=0.728$ ,  $p<0.01$ )

A

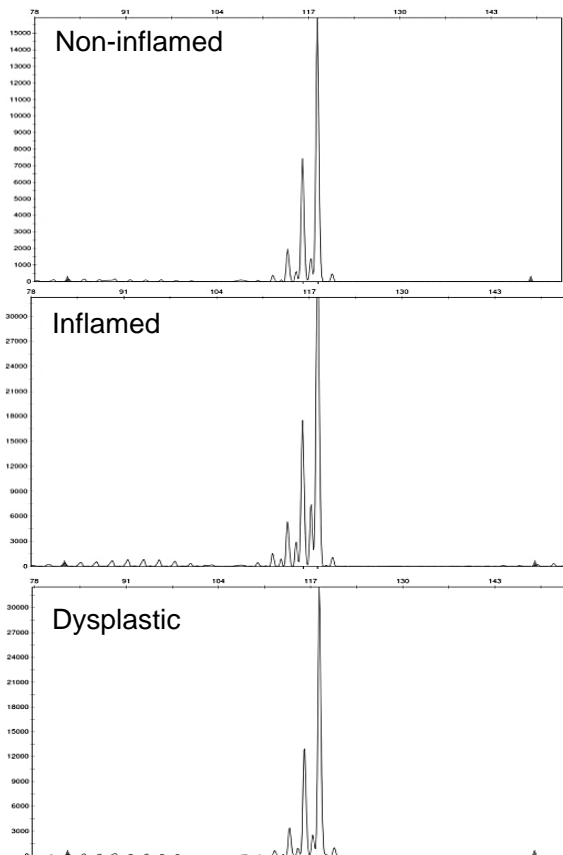

B

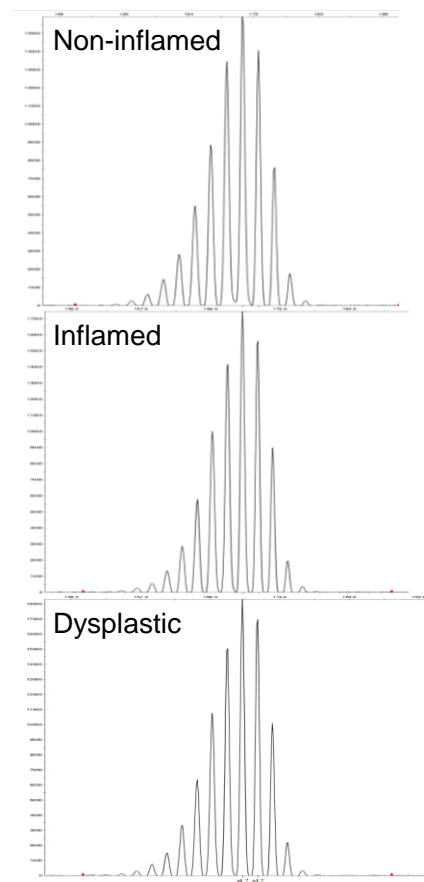

C

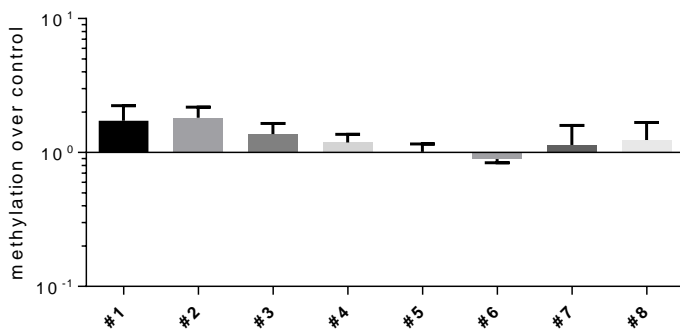

**Supplementary Figure 2: LOH, MSI and CIMP in IL-10 KO mice:** **A.** Fragment analysis of p53 aligning marker (D11mit86), showing exemplary result in non-inflamed, inflamed, and dysplastic tissue samples of the same mouse; no change in peak height or fragment length in neither of the samples was detected. **B.** MSI analysis showing an exemplary samples of the polyA marker A27. No change in fragment length was detected between any of the samples. **C.** CIMP analysis revealed no significant change in the methylation levels of dysplastic samples compared to non-inflamed samples. CIMP: CpG island methylator phenotype, LOH: Loss of heterozygosity, MSI: Microsatellite instability

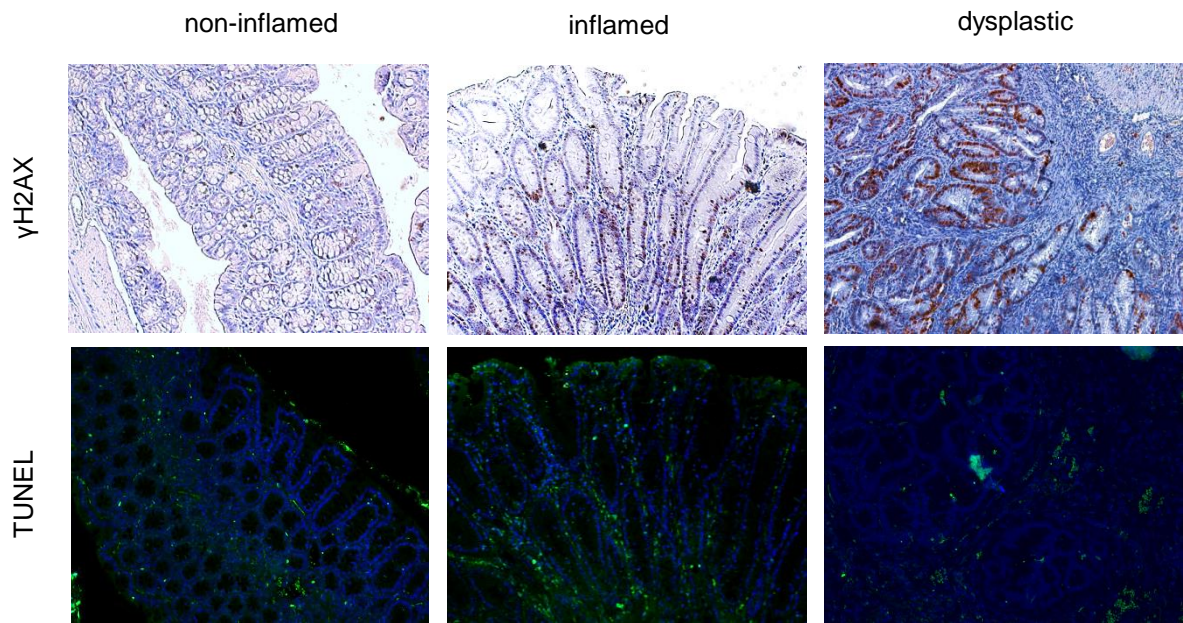

**Supplementary Figure 3: DNA damage and apoptosis in IL-10KO mice.** Comparison of  $\gamma$ H2AX stained slides (upper panel) with TUNEL staining (lower panel).

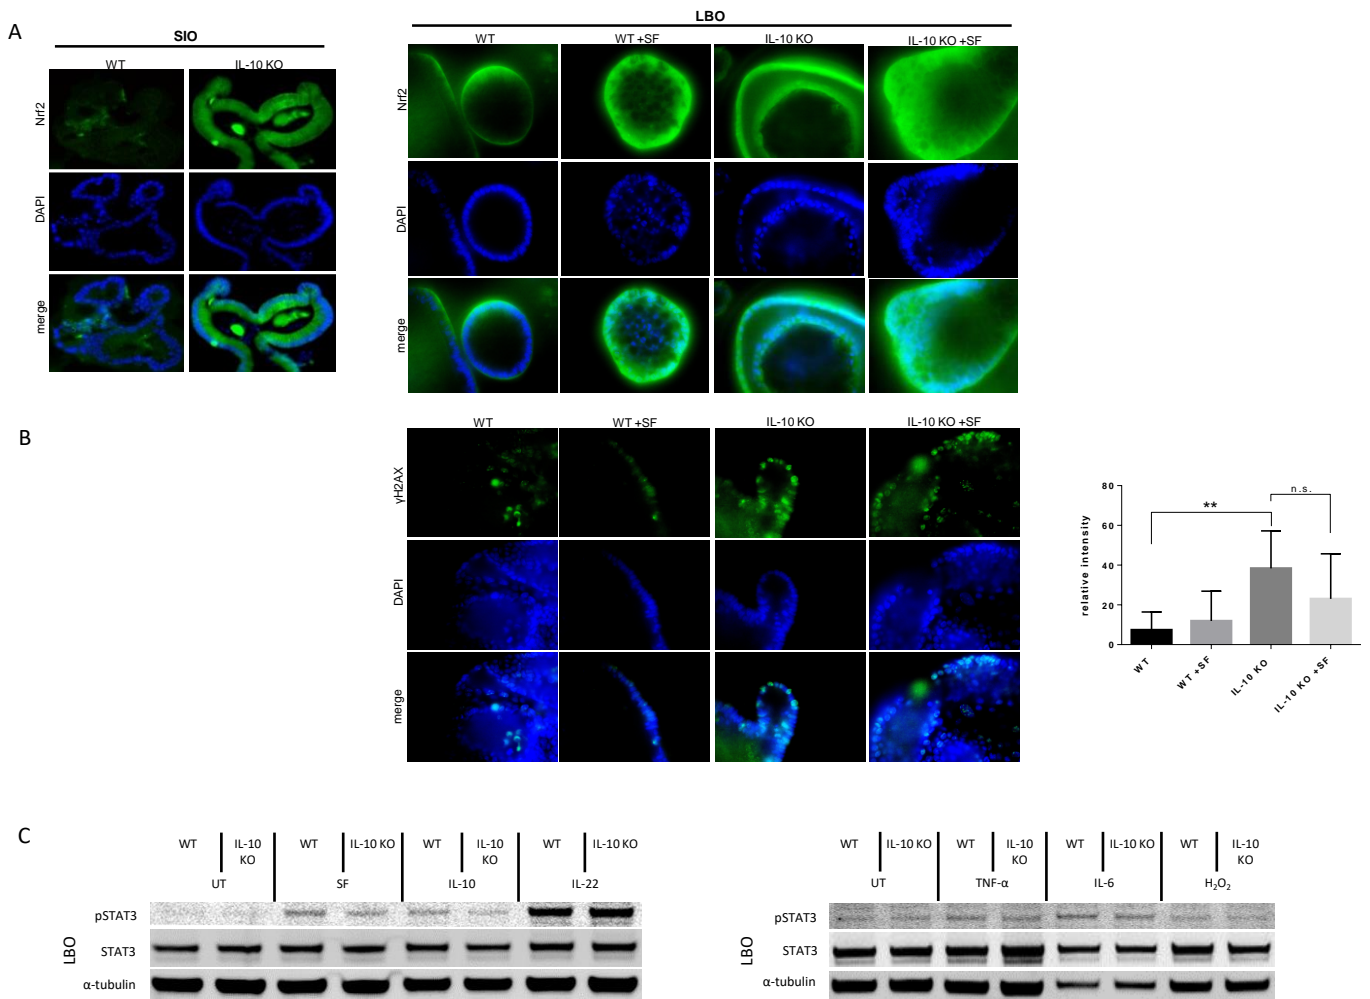

### Supplementary Figure: Nrf2 is increased in IL-10 KO small and large intestinal organoids.

**A:** IF of Nrf2 in WT- and IL-10 KO small and large bowel organoids indicates an overall increased and aberrant localization in IL-10 KO compared to WT. Treatment with Nrf2 activator indicates increase and translocation of Nrf2 into the nucleus in both WT and IL-10 KO LBOs. **B:** IF of  $\gamma$ H2AX in WT- and IL-10 KO LBOs, with- and without sulforaphane treatment (10 $\mu$ M). Nrf2 activation using SF did not result in reduced  $\gamma$ H2AX as indicated by IF and imageJ-analysis. Statistical analysis was done with ANOVA using Dunnet post hoc analysis. **C:** WB analysis of WT- and IL-10 KO LBOs, showing STAT3 phosphorylation after cytokine treatment. SF showed no change in STAT3 phosphorylation in IL-10 KO compared to WT. IF: immunofluorescence, LBO: large bowel organoids, SF: sulforaphane, SIO: small intestinal organoids
